# Supplementary material for: Is Rainwater Harvesting Sufficient to Satisfy The Emergency Water Demand for The Prevention of COVID-19? The Case of Dilla town, Southern, Ethiopia
Source: Preprints.org preprint supplement (doi:10.20944/preprints202008.0721.v1), 2020-08-31
Supplement: Supplementary file 1 [file supplementary]

Supplementary materials

Table 1 Institutional rain water harvesting potential using the maximum error estimate (MEE) approach in Dilla town southern Ethiopia

| Selected Large Public Institution in Dilla Town | Annual emergency water demand in M <sup>3</sup> | UCL In M <sup>3</sup> | Demand met using UCL, In % | Mean In M <sup>3</sup> | Demand met using Mean, in % | LCL, In M <sup>3</sup> | Demand met using LCL, In % |
|-------------------------------------------------|-------------------------------------------------|-----------------------|----------------------------|------------------------|-----------------------------|------------------------|----------------------------|
| Hospitals (with laundry facilities) DURH        | 5934.9                                          | 11,113.5              | 187.3                      | 8359.7                 | 140.8                       | 5605.8                 | 94.5                       |
| Health centers                                  | 2870.8                                          | 1,742.6               | 60.7                       | 1310.8                 | 45.66                       | 879                    | 30.6                       |
| Primary schools                                 | 13,176                                          | 19,752.6              | 149.9                      | 14858                  | 112.8                       | 9963.5                 | 75.62                      |
| Secondary schools                               | 1921.5                                          | 4,938.1               | 257                        | 3714.5                 | 193.3                       | 2490.9                 | 129.6                      |
| Technical and Vocational schools                | 1830                                            | 11,751.2              | 642.1                      | 8839.4                 | 483                         | 5927.5                 | 323.9                      |
| Colleges                                        | 146,000                                         | 149,492.7             | 102.4                      | 112449.5               | 77                          | 75406.23               | 51.65                      |
| Total                                           | 171,733.2                                       | 198,790.7             | 115.8                      | 149,531.8              | 87.1                        | 100,272.84             | 58.4                       |

Table 2 Institutional rain water harvesting potential using Coefficient of Variation (COV) approach in Dilla town southern Ethiopia

| Selected Large Public Institution in Dilla Town | Annual emergency water demand In M <sup>3</sup> | UCOV     | Demand met using UCL | LCL      | Demand met using LCOV |
|-------------------------------------------------|-------------------------------------------------|----------|----------------------|----------|-----------------------|
| Hospitals Hospital (with laundry facilities)    | 5934.9                                          | 14152.8  | 238.5                | 2566.61  | 43.3                  |
| Health centers                                  | 2870.8                                          | 2219.145 | 77.3                 | 402.4425 | 14                    |
| Primary schools                                 | 13,176                                          | 25154.28 | 191                  | 4561.734 | 34.6                  |
| Secondary schools                               | 1921.5                                          | 6288.57  | 327.3                | 1140.433 | 59.4                  |
| Technical and Vocational schools                | 1830                                            | 14964.85 | 817.8                | 2713.879 | 148.3                 |
| Colleges <sup>2</sup>                           | 146,000                                         | 190374.5 | 130.4                | 34524.46 | 23.6                  |

|       |          |          |       |          |      |
|-------|----------|----------|-------|----------|------|
| Total | 171733.2 | 253154.1 | 147.4 | 45909.56 | 26.7 |
|-------|----------|----------|-------|----------|------|
